# Supplementary material for: Silviridoside: A New Triterpene Glycoside from Silene viridiflora with Promising Antioxidant and Enzyme Inhibitory Potential
Source: MDPI journal article supplement (doi:10.3390/molecules27248781), 2022-12-11
Supplement: s1 [file s1]

**Silviridoside: A New Triterpene Glycoside from *Silene*  
*viridiflora* with Promising Antioxidant and Enzyme Inhibitory Potential**

Markhabo M. Makhmudova<sup>1</sup>, Markus Bacher<sup>2</sup>, Gokhan Zengin<sup>3</sup>, Thomas Rosenau<sup>2</sup>, Fadia S. Youssef<sup>4</sup>,  
Diena M. Almasri<sup>5</sup>, Sameh S. Elhady<sup>6</sup>, Nilufar Z. Mamadalieva<sup>1\*</sup>

<sup>1</sup> Institute of the Chemistry of Plant Substances of the Academy Sciences of Uzbekistan, Tashkent 100170, Uzbekistan

<sup>2</sup> Department of Chemistry, Institute of Chemistry of Renewable Resources, University of Natural Resources and Life Sciences Vienna (BOKU), 3430 Tulln, Austria

<sup>3</sup> Department of Biology, Science Faculty, Selcuk University, Konya 42130,

<sup>4</sup> Department of Pharmacognosy, Faculty of Pharmacy, Ain-Shams University, Abbasia, Cairo11566, Egypt

<sup>5</sup> Department of Pharmacy Practice, Faculty of Pharmacy, King Abdulaziz University, Jeddah 21589, Saudi Arabia

<sup>6</sup> Department of Natural Products, Faculty of Pharmacy, King Abdulaziz University, Jeddah 21589, Saudi Arabia

\* Correspondence: nmamadalieva@yahoo.com

**Supplementary data**

**Figure S1:** Representative UHPLC-QToF-MS total ion chromatogram of the methanolic extract isolated from *Silene viridiflora* in negative ionization mode

**Figure S2:** UHPLC-QToF-MS spectrum of silviridoside in the negative ion mode

**Figure S3:** UHPLC-QToF-MS/MS spectrum of silviridoside in the negative ion mode

**Figure S4:** <sup>1</sup>H NMR spectrum of silviridoside

**Figure S5:** <sup>1</sup>H NMR spectrum of silviridoside – (Expanded part)

**Figure S6:** <sup>1</sup>H NMR spectrum of silviridoside - (Expanded part)

**Figure S7:** <sup>13</sup>C NMR spectrum of silviridoside

**Figure S8:** <sup>13</sup>C NMR spectrum of silviridoside - (Expanded part)

**Figure S9:** COSY spectrum of silviridoside

**Figure S10:** HSQC spectrum of silviridoside

**Figure S11:** HMBC spectrum of silviridoside

**Figure S12:** NOESY spectrum of silviridoside

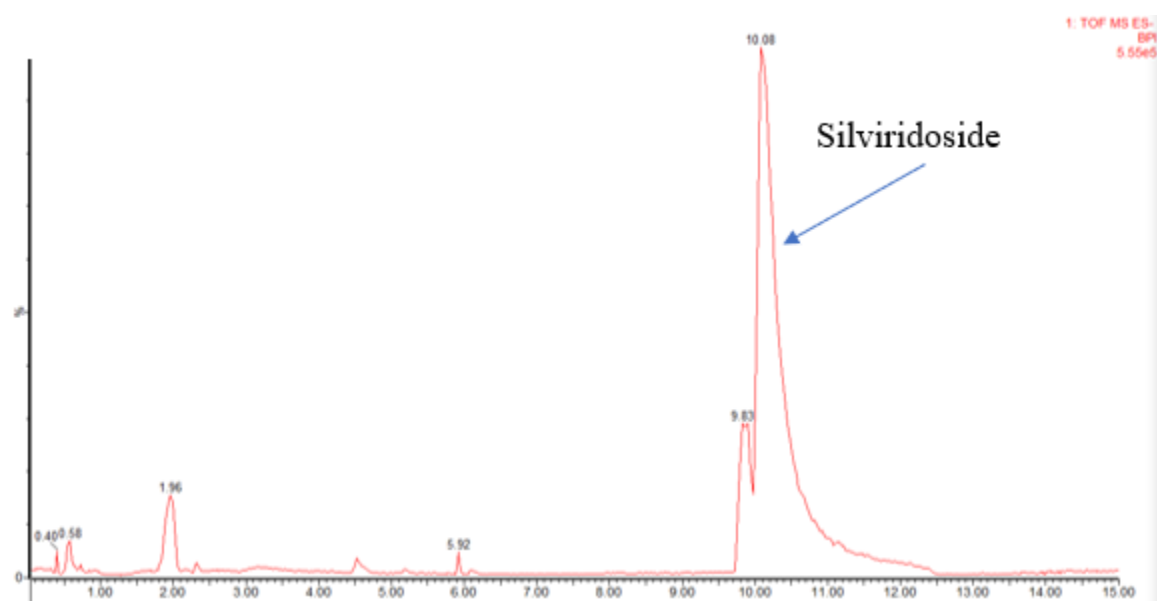

**Figure S1:** Representative UHPLC-QToF-MS total ion chromatogram of the methanolic extract isolated from *Silene viridiflora* in negative ionization mode

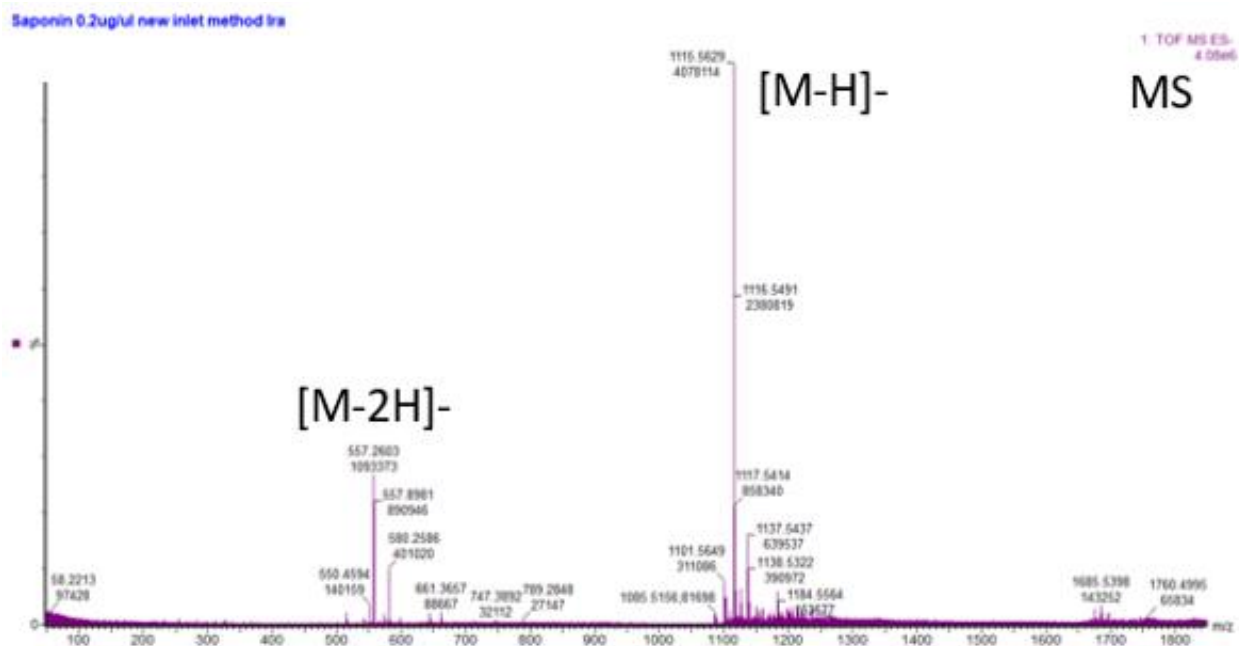

**Figure S2:** UHPLC-QToF-MS spectrum of silviridoside in the negative ion mode

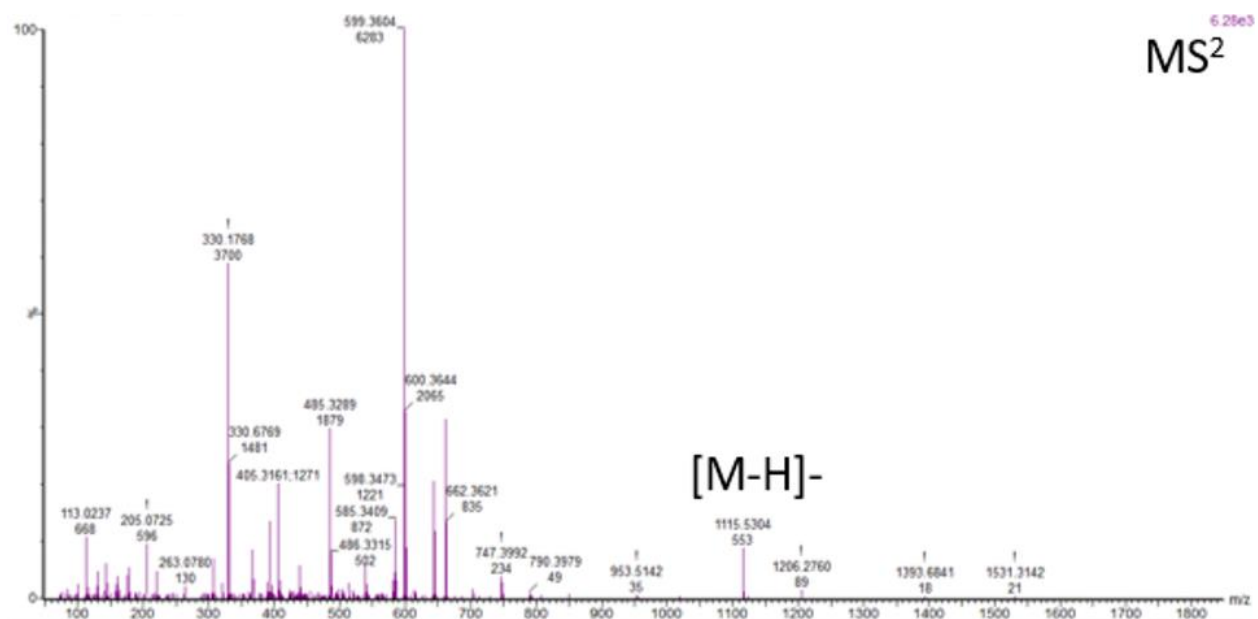

**Figure S3:** UHPLC-QToF-MS/MS spectrum of silviridoside in the negative ion mode

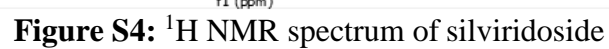

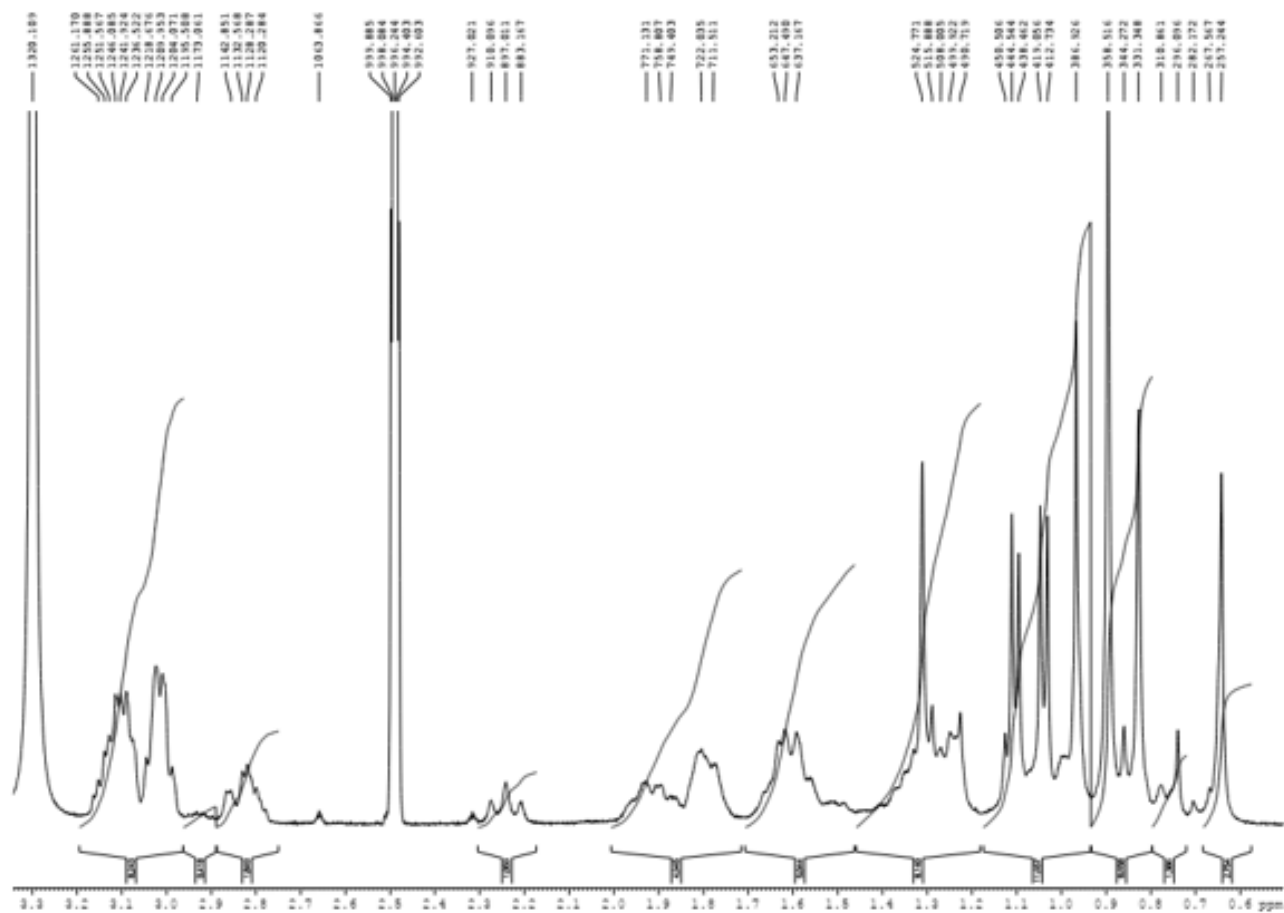

**Figure S5:**  $^1\text{H}$  NMR spectrum of silviridoside (Expanded part)

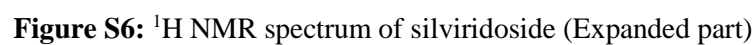

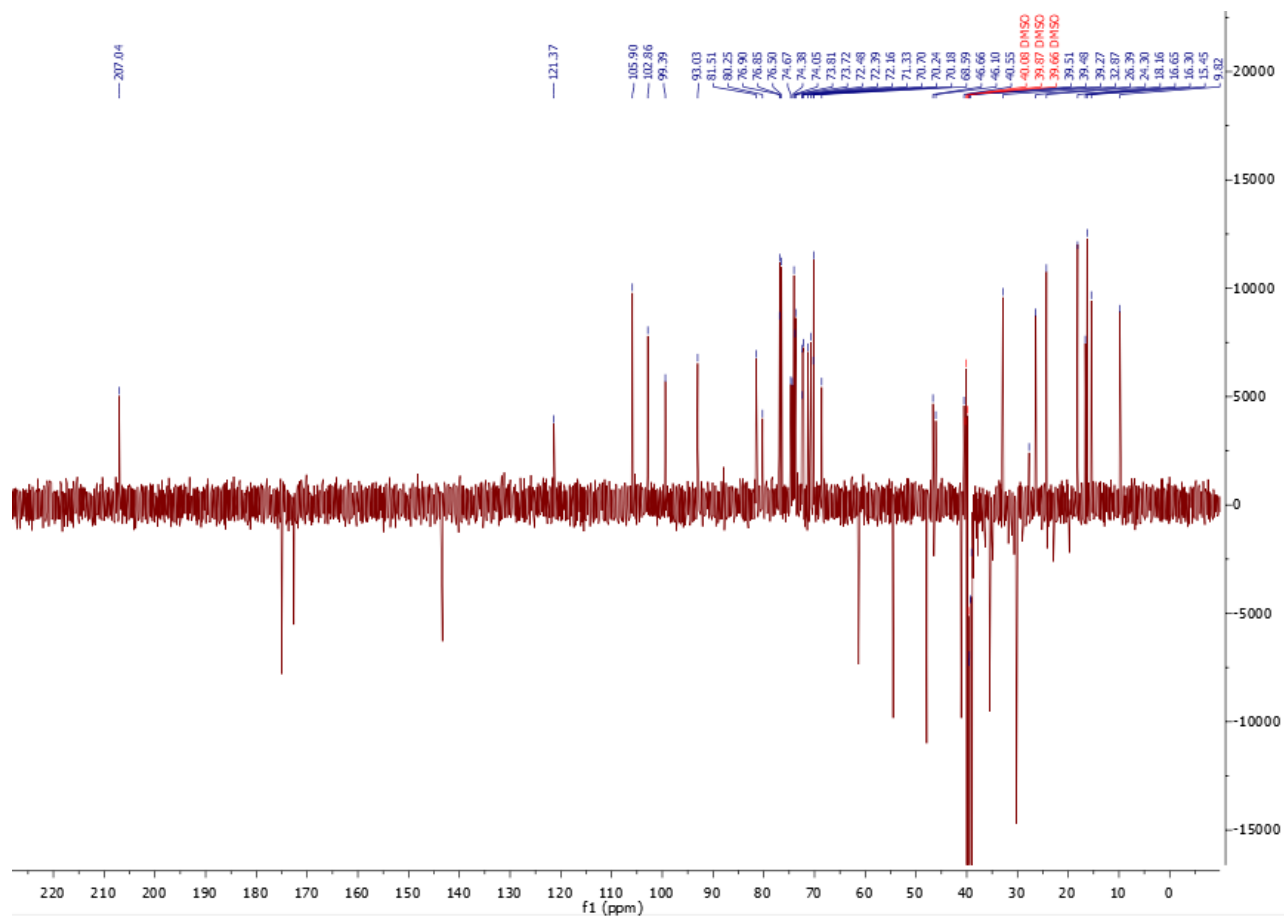

**Figure S7:**  $^{13}\text{C}$  NMR spectrum of silviridoside



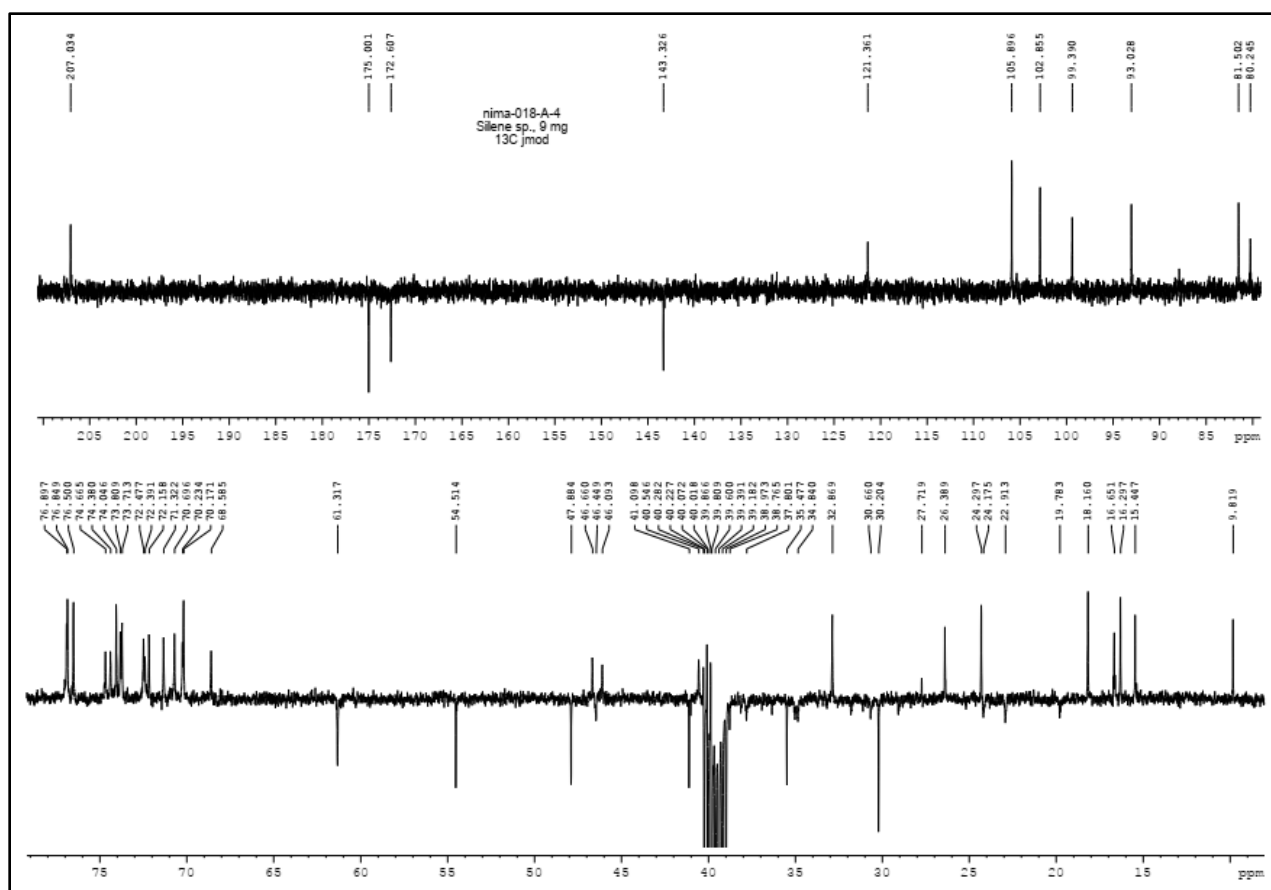

**Figure S8:**  $^{13}\text{C}$  NMR spectrum of silviridoside - (Expanded part)

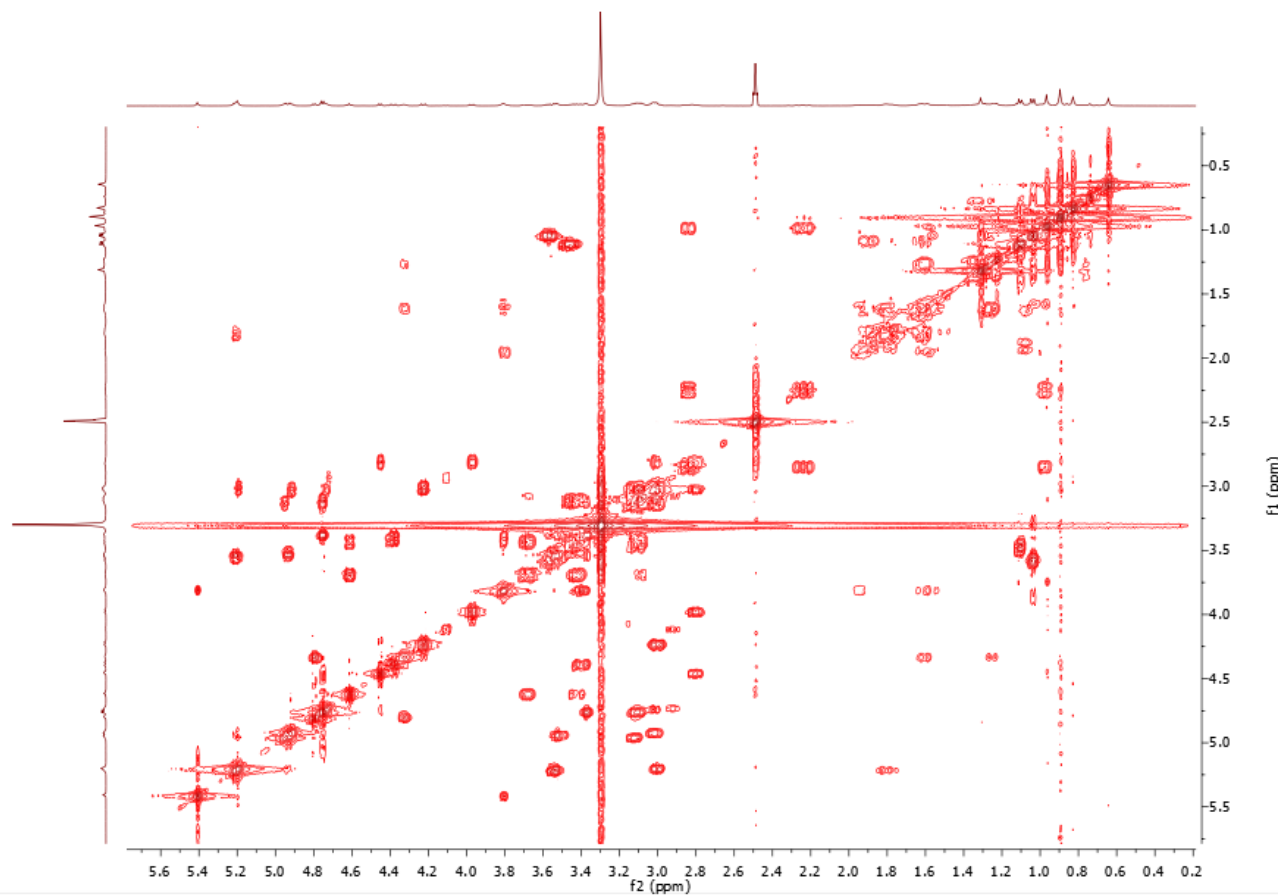

**Figure S9:** COSY spectrum of silviridoside

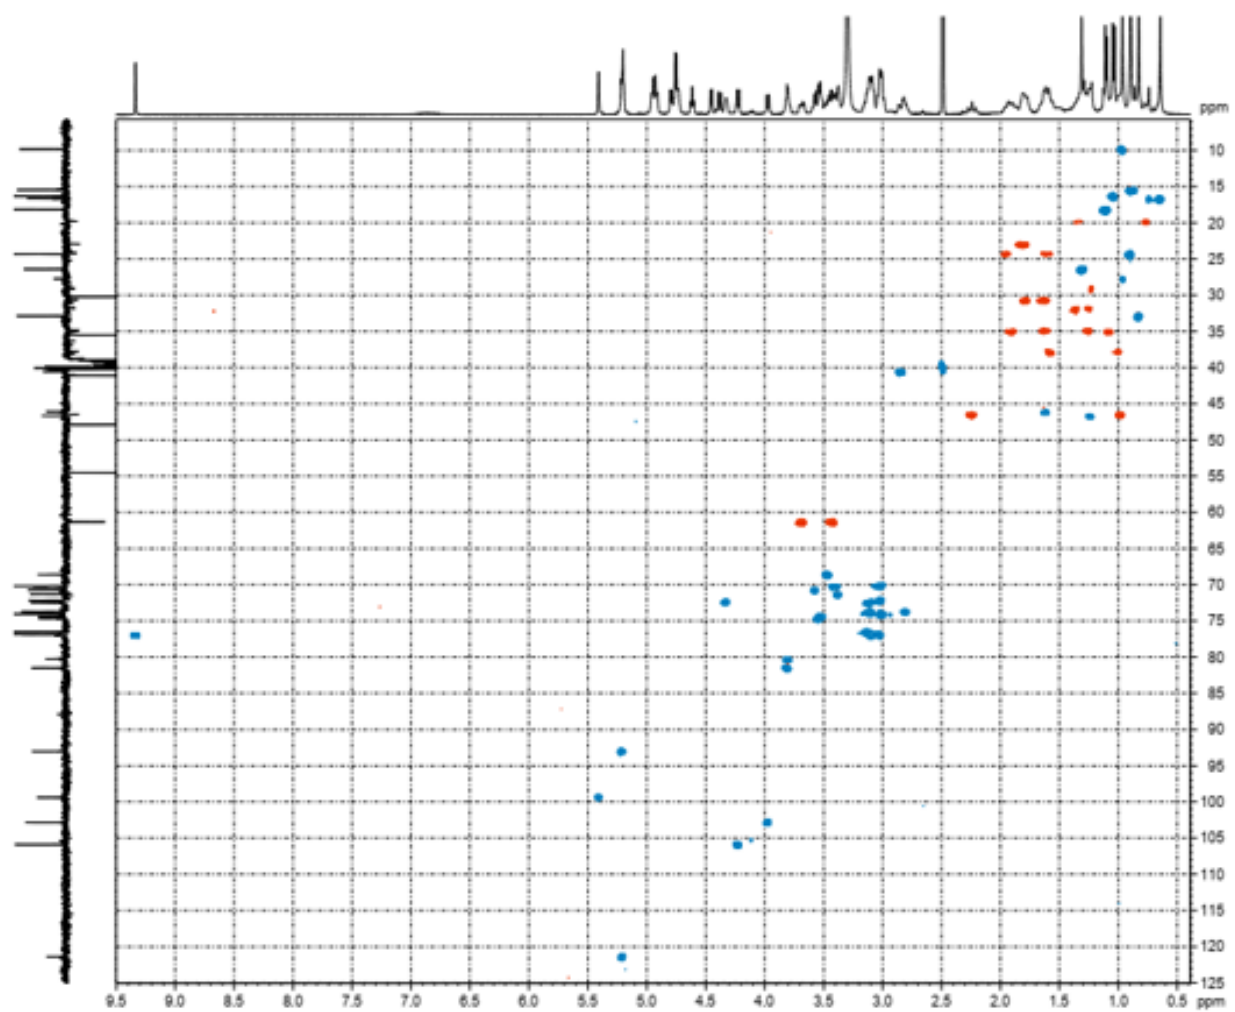

**Figure S10:** HSQC spectrum of silviridoside

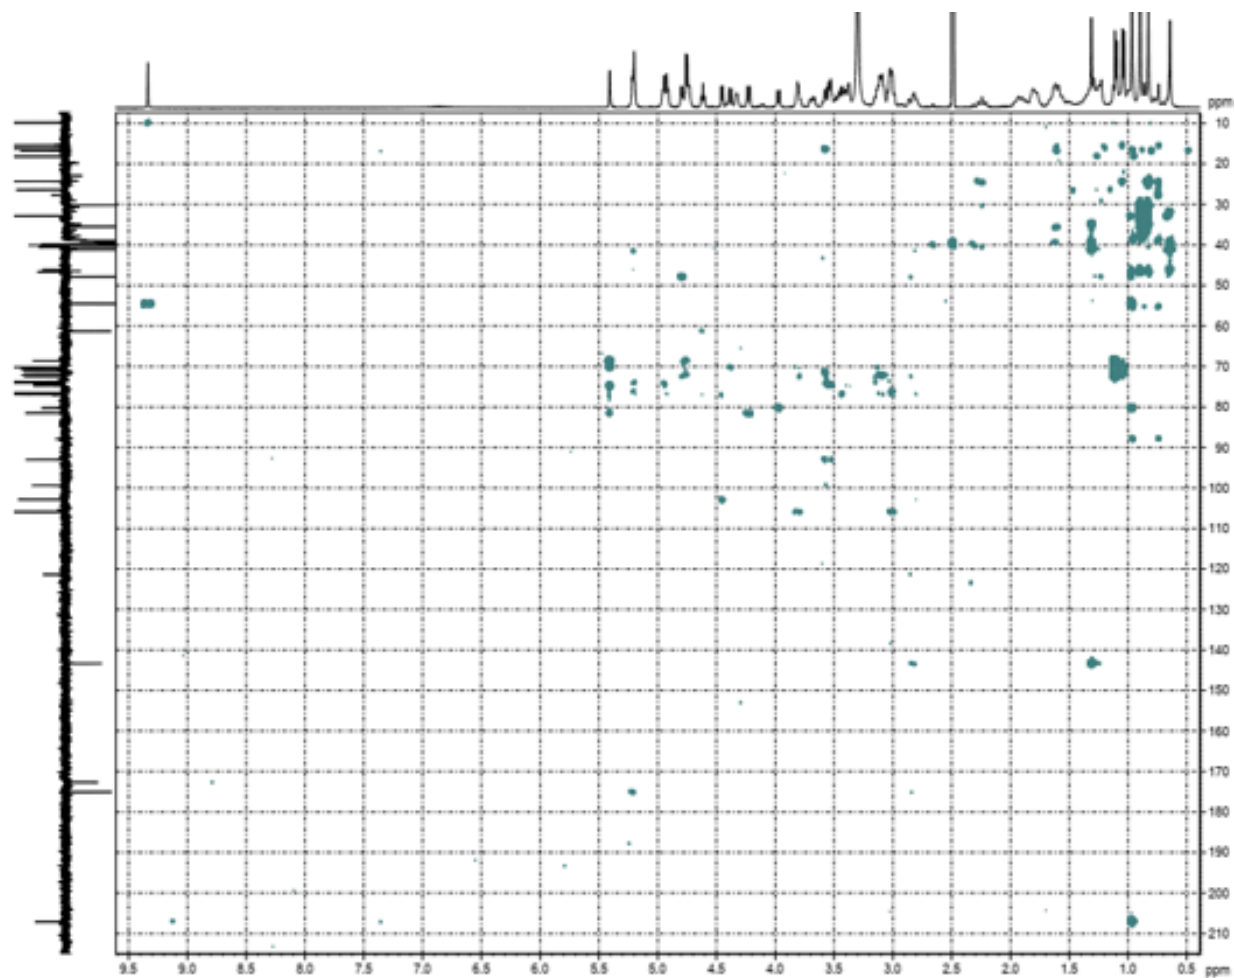

**Figure S11:** HMBC spectrum of silviridoside

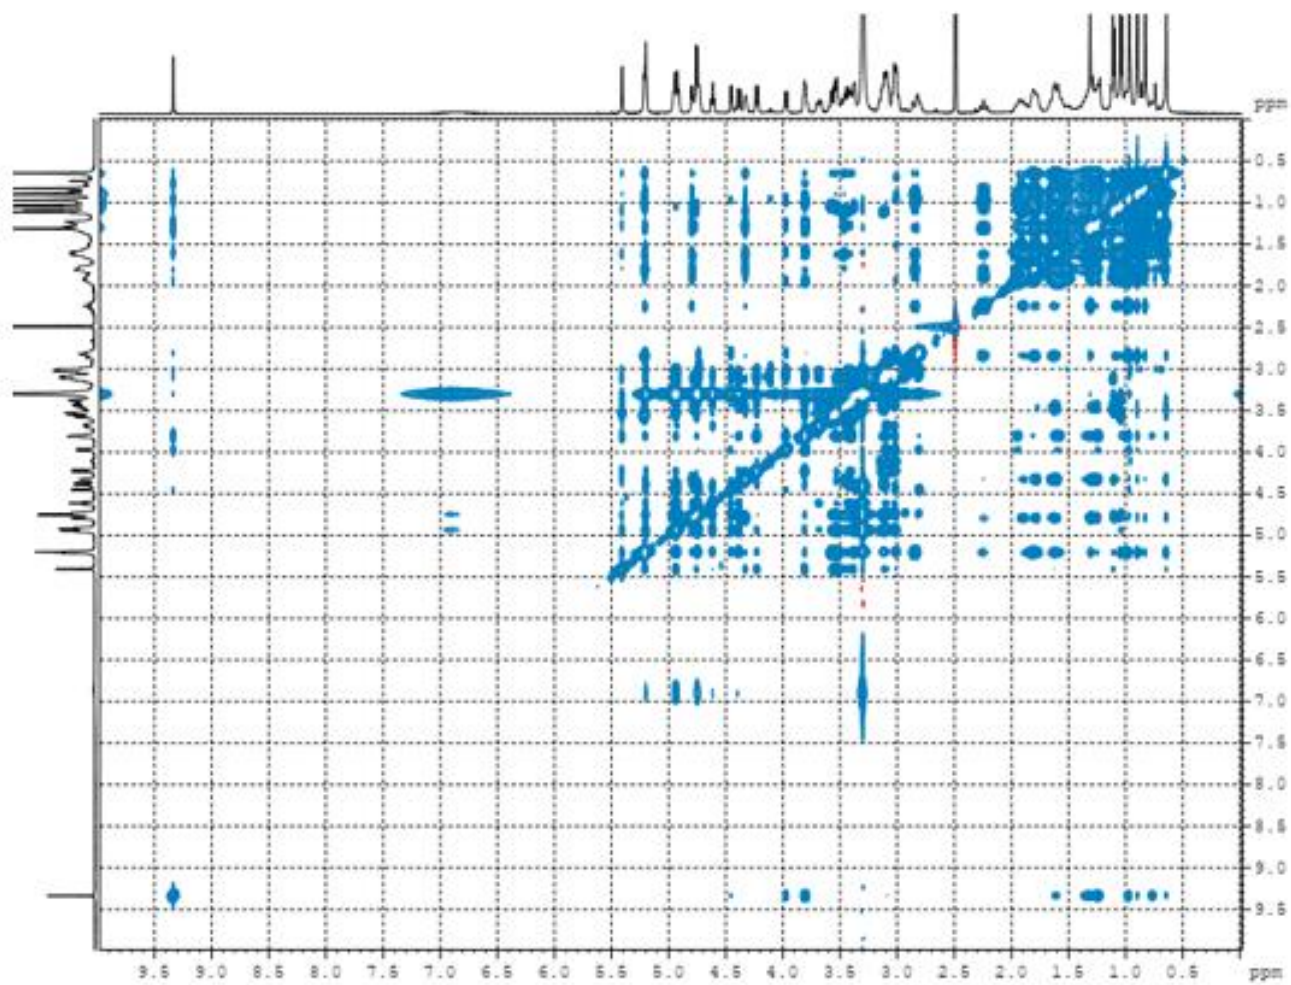

**Figure S12:** NOESY spectrum of silviridoside
